# Supplementary material
Source: PubMed Central journal article supplement (PMC3079338)

Supplemental Figure

Figure legend

Figure 1. Staining of different antigens in esophageal papilloma sections from NMBA-treated animals. A, Ki-67. B, TUNEL. C, COX-2. D, NFkB p50. E, CD45 and F, CD34.

A. Ki-67

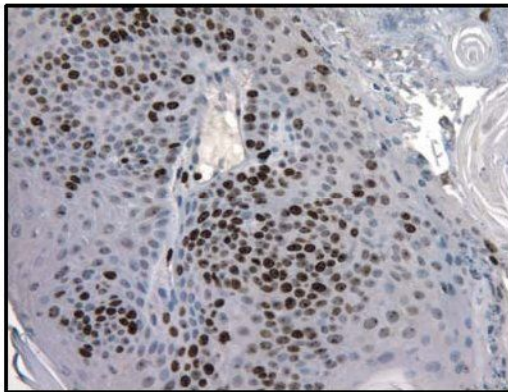

B. TUNEL

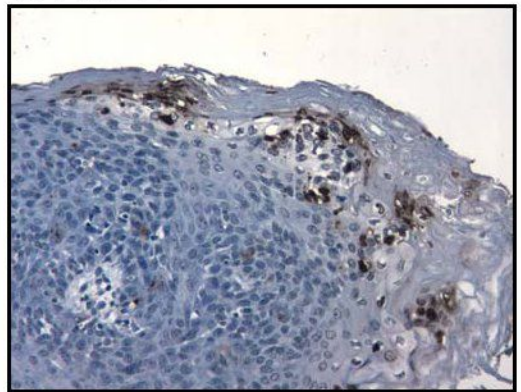

C. COX-2

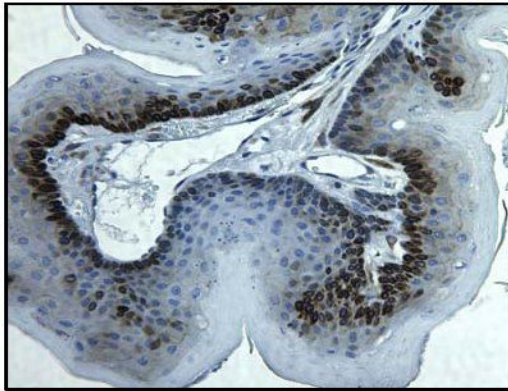

D. NFkB p50

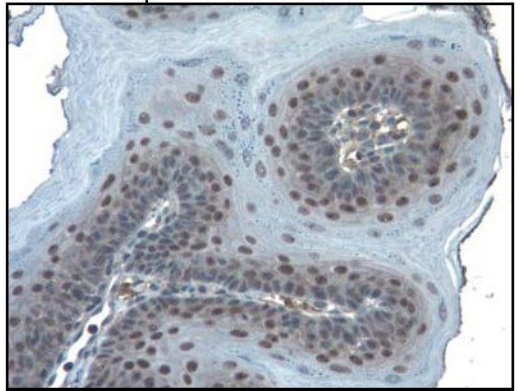

E. CD45

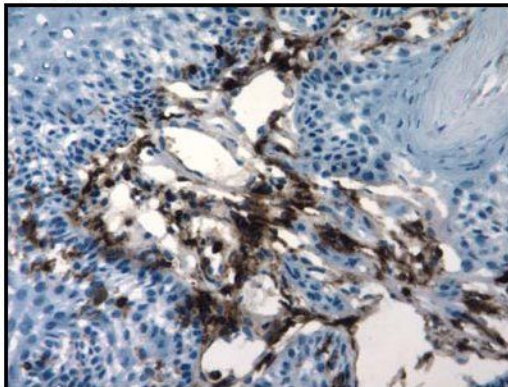

F. CD34

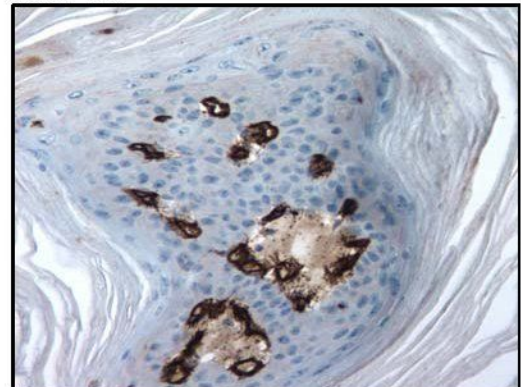

Supplement: NIHMS258989-supplement-supplemental_data.pdf [file NIHMS258989-supplement-supplemental_data.pdf]
